# Supplementary material for: Hindi version of short form of douleur neuropathique 4 (S-DN4) questionnaire for assessment of neuropathic pain component: a cross-cultural validation study
Source: PubMed Central journal article supplement — Korean J Pain. 2017 Jun 30;30(3):197–206. doi: 10.3344/kjp.2017.30.3.197 (PMC5532527; doi:10.3344/kjp.2017.30.3.197), 2017-06-30
Supplement: kjpain-30-197-s001.pdf [file kjpain-30-197-s001.pdf]

## Supplementary material 1

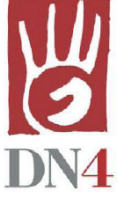

## प्रश्नावली DN4 - साक्षात्कार

कृपया नीचे दिए गए 2 सवालों में हर आईटम के लिए एक जवाब पर निशान लगा कर इस प्रश्नावली को पूरा करें:

**सवाल 1:** क्या दर्द की एक या ज़्यादा नीचे दी गई विशेषताएं हैं?

|                   | हाँ                      | नहीं                     |
|-------------------|--------------------------|--------------------------|
| 1 - जलन           | <input type="checkbox"/> | <input type="checkbox"/> |
| 2 - दर्दभरी ठण्ड  | <input type="checkbox"/> | <input type="checkbox"/> |
| 3 - बिजली के झटके | <input type="checkbox"/> | <input type="checkbox"/> |

**सवाल 2:** क्या दर्द एक ही जगह पर एक या ज़्यादा नीचे दिए गए लक्षणों से संबंधित है?

|             | हाँ                      | नहीं                     |
|-------------|--------------------------|--------------------------|
| 4 - झुनझुनी | <input type="checkbox"/> | <input type="checkbox"/> |
| 5 - चुभन    | <input type="checkbox"/> | <input type="checkbox"/> |
| 6 - सुन्नता | <input type="checkbox"/> | <input type="checkbox"/> |
| 7 - खुजली   | <input type="checkbox"/> | <input type="checkbox"/> |
